# Supplementary material
Source: PubMed Central journal article supplement (PMC150018)
Supplement: plntcell_15_3_626__1.pdf [file plntcell_15_3_626__1.pdf]

Table 2. Genes up-regulated in leaves of *Arabidopsis ada2b-1* or *gcn5-1* mutant plants as assayed by Affymetrix microarray.<sup>a</sup>

| Gene groups <sup>b</sup> | Probe set <sup>c</sup> | Gene number <sup>d</sup>           | Gene description                           | Fold change in <i>ada2b-1</i> <sup>e</sup> | Fold change in <i>gcn5-1</i> <sup>e</sup> |
|--------------------------|------------------------|------------------------------------|--------------------------------------------|--------------------------------------------|-------------------------------------------|
| <b>Transcription</b>     |                        |                                    |                                            |                                            |                                           |
| Transcription Factors    | 13015                  | At2g46680                          | ZAT12                                      | 4.7                                        | 7.9                                       |
|                          | 13273                  | AT4g36990                          | AtHSF4                                     | 11                                         | 16                                        |
|                          | 13432                  | At2g25000                          | WRKY60                                     | 4.3                                        | 6.8                                       |
|                          | 13806                  | At2g17040                          | putative NAM/no apical meristem protein    | 4.0                                        | 7.3                                       |
|                          | 13933                  | AT4g17230                          | scarecrow-like 13 (SCL13)                  | 4.2                                        | 4.6                                       |
|                          | 14431                  | AT4g23810                          | WRKY53                                     | 4.6                                        | 7.7                                       |
|                          | 14711                  | At2g40140                          | Cys-3-His zinc finger protein              | 29                                         | 30                                        |
|                          | 15779                  | AT3g46090                          | ZAT7                                       | 8.5                                        | 10                                        |
|                          | 15665                  | AT5g04340                          | putative c2h2 zinc finger                  | 6.5                                        | 9.4                                       |
|                          | 16063                  | At4g17500                          | AtERF-1                                    | 15                                         | 21                                        |
|                          | 16130                  | AT4g11370                          | RING-H2 finger protein RHA1a               | 4.2                                        | 5.5                                       |
|                          | 16536                  | At5g47230                          | AtERF5                                     | 6.0                                        | 5.5                                       |
|                          | 16609                  | AT5g47220                          | AtERF2                                     | 11                                         | 16                                        |
|                          | 16945                  | AT4g27900                          | unknown, similarity to Zn finger from rice | 3.9                                        | 4.8                                       |
|                          | 17303                  | At2g38470                          | WRKY33                                     | 12                                         | 13                                        |
|                          | 18216                  | At1g27730                          | ZAT10, Salt tolerance zing finger          | 10                                         | 13                                        |
|                          | 18591                  | At5g63790                          | ATAF2                                      | 5.2                                        | 6.4                                       |
|                          | 19646                  | At2g46680                          | homeodomain transcription factor (ATHB-7)  | 4.7                                        | 5.1                                       |
|                          | 19936                  | At1g70000                          | DNA binding protein MybSt1, putative       | 6.1                                        | 12                                        |
|                          | 20382                  | At2g30250                          | WRKY25                                     | 4.0                                        | 6.1                                       |
|                          | 12643                  | At1g34180                          | putative NAM/no apical meristem protein    | 3.4 <sup>f</sup>                           | 5.7                                       |
|                          | 12712                  | At1g18570                          | myb factor, putative                       | 3.2 <sup>f</sup>                           | 4.0                                       |
|                          | 13115                  | At1g62300                          | WRKY6                                      | 8.3 <sup>f</sup>                           | 14                                        |
|                          | 18590                  | At1g69490                          | NAP (NAC-like, activated by AP3/PI)        | 2.1                                        | 3.1                                       |
|                          | 13381                  | At2g43000                          | Putative NAM/no apical meristem protein    | 2.9                                        | 6.0                                       |
|                          | 14553                  | At3g54810                          | GATA transcription factor putative         | 7.3 <sup>f</sup>                           | 11                                        |
|                          | 16829                  | AT4g01920                          | CHP-rich zinc finger                       | 2.2                                        | 5.0                                       |
|                          | 17052                  | At1g52880                          | NAC domain protein NAM                     | 2.9                                        | 3.6                                       |
|                          | 17180                  | AT5g26920                          | GATA-type zinc fingers                     | A                                          | 5.4                                       |
|                          | 17881                  | At2g23320                          | WRKY15                                     | 2.2                                        | 3.8                                       |
|                          | 18600                  | AT3g16720                          | RING-H2 Zn finger at12 protein             | 3 <sup>f</sup>                             | 4.9                                       |
|                          | 19202                  | At2g45680                          | PCF2-like DNA binding protein              | 2.3                                        | 3.7                                       |
|                          | 19696                  | At4g24240                          | WRKY7                                      | 3.1 <sup>f</sup>                           | 4.0                                       |
|                          | 16638                  | At4g24240                          | putative zinc finger protein PMZ           | 4.2                                        | 3.3 <sup>f</sup>                          |
| 16539                    | AT4g17490              | AtERF6                             | 4.8                                        | 1.8                                        |                                           |
| 13271                    | At4g18880              | heat shock transcription factor 21 | 3.0                                        | 2.3                                        |                                           |

|                            |         |           |                                                                       |                                                                            |                  |     |
|----------------------------|---------|-----------|-----------------------------------------------------------------------|----------------------------------------------------------------------------|------------------|-----|
| HATs<br>mRNA splicing      | 19537   | At1g67220 | CBP related protein (pCAT1)                                           | A                                                                          | 4.3              |     |
|                            | 12390   | At2g42270 | putative U5 small nuclear ribonucleoprotein-specific protein.         | 3.1                                                                        | 4.2              |     |
|                            | 18242   | At2g42890 | putative RNA-binding protein mei2                                     | 3.6                                                                        | 3.6              |     |
|                            | 18001   | At1g01040 | CAF RNA helicase/RNaseIII                                             | 2.2                                                                        | 3.5              |     |
| <b>Signal Transduction</b> |         |           |                                                                       |                                                                            |                  |     |
| Receptor-like kinases      | 12497   | At2g31880 | Receptor-like kinase, LRR VII                                         | 7.7                                                                        | 10               |     |
|                            | 12958   | At2g33580 | Receptor-like kinase Lys M                                            | 9.5                                                                        | 13               |     |
|                            | 13659   | AT4g23150 | serine/threonine kinase-like protein, KIK1 (DUF26)                    | 4                                                                          | 5.8              |     |
|                            | 14763   | AT3g09010 | AK13 gene RECEPTOR-LIKE kinase LRRVIII-2                              | 7.4                                                                        | 10               |     |
|                            | 15616   | At1g21250 | wak1                                                                  | 10                                                                         | 8.4              |     |
|                            | 16059   | At1g14370 | APK2a mRNA for protein kinase, RLCK VII                               | 4.1                                                                        | 5.8              |     |
|                            | 16348   | At1g65790 | receptor kinase (Ark1) gene, S-domain                                 | 4.7                                                                        | 5.3              |     |
|                            | 16360   | AT4g21380 | Receptor-like serine/threonine protein kinase S-domain, ark3          | 4.6                                                                        | 5                |     |
|                            | 16393   | At2g13790 | Receptor-like kinase, LRR II                                          | 9.3                                                                        | 9.4              |     |
|                            | 16781   | At2g19130 | Receptor-like kinase, S-RECEPTOR KINASE                               | 6.5                                                                        | 8.4              |     |
|                            | 19092   | AT4g11890 | protein kinase-like (KIK1) SUBFAMILY duf26                            | 7.3                                                                        | 13               |     |
|                            | 19433   | AT4g23270 | Receptor-like serine/threonine kinase (duf26)                         | 3.9                                                                        | 5.7              |     |
|                            | 20232   | AT4g23130 | RECEPTOR LIKE KINASE (RLK6, DUF26)                                    | 6.6                                                                        | 9.7              |     |
|                            | 12305   | AT4g23260 | similar to receptor protein kinase (S-domain), <i>Ipomoea trifida</i> | 2.8                                                                        | 4.2              |     |
|                            |         | 12307     | At2g19190                                                             | Receptor-like kinase, LRR I (FRK1)                                         | 4 <sup>f</sup>   | 5.9 |
|                            |         | 12354     | At2g37710                                                             | Receptor-like kinase, L-lectin (LRK1)                                      | 3 <sup>f</sup>   | 3.7 |
|                            |         | 16357     | AT5g25930                                                             | Receptor-like kinase, LRK5 (LRR XI)                                        | 3.7 <sup>f</sup> | 5.1 |
|                            |         | 16363     | At1g61370                                                             | receptor protein kinase IRK1 S-domain                                      | 2.1              | 3.3 |
|                            |         | 17068     | At5g60900                                                             | S-receptor kinase homolog 2                                                | 3.5 <sup>f</sup> | 5.4 |
|                            |         | 17464     | At1g09970                                                             | Receptor-like kinase, LRR XI                                               | 2.6              | 3.5 |
|                            |         | 19462     | AT3g59700                                                             | serine/threonine-specific kinase<br>lecRK1 precursor, lectin receptor-like | 3.9 <sup>f</sup> | 5   |
|                            | Kinases | 16061     | AT4g26070                                                             | MEK1 (MAPKK)                                                               | 8.2              | 9.3 |
|                            |         | 15680     | At3g08720                                                             | ATPK19 mRNA for ribosomal-protein S6 kinase homolog                        | 7.8              | 11  |
| 16412                      |         | At4g21400 | serine/threonine protein kinase                                       | 5.4                                                                        | 3.8              |     |
| 15005                      |         | At2g30040 | kinase                                                                | 4.8                                                                        | 5.7              |     |
| 16151                      |         | AT5g02290 | NAK S/T kinase                                                        | 4.4                                                                        | 4.2              |     |
| 18952                      |         | At4g23900 | nucleoside diphosphate kinase 4                                       | A                                                                          | 5.2              |     |
| 17354                      |         | At4g35500 | SRPK1                                                                 | 2.3                                                                        | 3                |     |
| Phosphatases               | 13022   | At1g34750 | Phosphatase type 2C                                                   | 3.6 <sup>f</sup>                                                           | 5.8              |     |
|                            | 16203   | At1g47510 | inositol polyphosphate 5-phosphatase                                  | A                                                                          | 5.3              |     |
|                            | 20107   | At1g05630 | inositol 1,4,5-trisphosphate- 5-phosphatase                           | 1.3                                                                        | 4.3              |     |
| Lipases                    | 16493   | At1g54010 | lipase-like                                                           | 12                                                                         | 13               |     |
|                            | 20590   | AT4g38550 | Phospholipase like, pEARLI 4                                          | 3.4 <sup>f</sup>                                                           | 4.1              |     |

|                             |             |           |                                                                                                  |                                     |                  |     |
|-----------------------------|-------------|-----------|--------------------------------------------------------------------------------------------------|-------------------------------------|------------------|-----|
| Others                      | 14250       | AT3g52430 | pad4, SA signaling                                                                               | 8.8                                 | 8.3 <sup>f</sup> |     |
|                             | 19435       | AT4g00240 | phospholipase D                                                                                  | 4                                   | 2.4              |     |
|                             | 20142       | AT4g34390 | extra-large G-protein-like                                                                       | 4.3                                 | 4.5              |     |
|                             | 16995       | At2g23170 | auxin-responsive GH3 - like                                                                      | 4.3                                 | 9.6              |     |
|                             | 12772       | At1g03220 | glycoprotein                                                                                     | 3.9                                 | 4.7              |     |
|                             | 12760       | At1g03230 | Strong similarity extracellular dermal glycoprotein (EDGP) precursor from <i>Daucus carota</i> . | 3.1                                 | 3.5              |     |
|                             | 15965       | AT3g16460 | Putative lectin                                                                                  | 3.2 <sup>f</sup>                    | 4                |     |
|                             | 16952       | At2g41410 | calmodulin-like                                                                                  | 2.5                                 | 4.5              |     |
| <b>Cell Rescue, Defense</b> |             |           |                                                                                                  |                                     |                  |     |
| Peroxidases                 | 17930       | AT4g37520 | Peroxidase, PRXR2                                                                                | 12                                  | 16               |     |
|                             | 17413       | AT5g64120 | peroxidase                                                                                       | 7.8                                 | 8.1              |     |
|                             | 16963       | At2g38390 | peroxidase C3 precursor                                                                          | 7.3                                 | 4.1              |     |
|                             | 15982       | At2g37130 | peroxidase ATP2a                                                                                 | 4.2                                 | 4.6              |     |
|                             | 14638       | AT3g49120 | peroxidase prxCb                                                                                 | 3.4                                 | 4.8              |     |
|                             | 17102       | At1g05260 | peroxidase precursor RC13A                                                                       | 6.1                                 | 3.2 <sup>f</sup> |     |
|                             | 12324       | At2g18150 | class III peroxidase ATP36                                                                       | 4.5                                 | 1.3              |     |
| GST                         | 16462       | At2g38380 | class III peroxidase ATPEa                                                                       | 3.9                                 | 1.8              |     |
|                             | 16054       | At1g02920 | GST11 (GSTF8)                                                                                    | 170                                 | 250              |     |
|                             | 19640       | At2g29460 | GST22                                                                                            | 9.9                                 | 23               |     |
|                             | 20356       | At2g29470 | GST21                                                                                            | 8.3                                 | 20               |     |
|                             | 12764       | At2g02930 | GST16 (GSTZ1)                                                                                    | 6.7                                 | 10               |     |
|                             | Thioredoxin | 13189     | At1g45145                                                                                        | thioredoxin                         | 10               | 8.8 |
|                             |             | 12623     | At1g60420                                                                                        | red-1 (related to thioredoxin) gene | 3.5 <sup>f</sup> | 5.7 |
| Copper amine oxidase        | 20585       | At2g47880 | putative glutaredoxin                                                                            | A                                   | 14               |     |
| Defense related genes       | 20555       | At4g12280 | copper amine oxidase like                                                                        | 2.3                                 | 4.3              |     |
|                             | 13212       | AT3g57260 | beta-1,3-glucanase (BG-2, PR-2)                                                                  | 75                                  | 120              |     |
|                             | 17485       | AT4g16260 | beta-1, 3-glucanase class I precursor                                                            | 8                                   | 52               |     |
|                             | 12364       | AT3g57240 | beta-1,3-glucanase (BG3)                                                                         | 2.1                                 | 6.9              |     |
|                             | 12574       | AT3g60140 | beta-glucosidase like                                                                            | 21                                  | 56               |     |
|                             | 19451       | At1g61820 | beta-glucosidase                                                                                 | 4.4                                 | 7.7              |     |
|                             | 17840       | At2g43570 | endochitinase, class IV                                                                          | 70                                  | 110              |     |
|                             | 20287       | AT3g54420 | Chitinase class IV                                                                               | 7.3                                 | 9                |     |
|                             | 20420       | AT4g19810 | chitinase , class V?                                                                             | 6.4                                 | 9.5              |     |
|                             | 12332       | AT3g12500 | Basic chitinase                                                                                  | 4.2                                 | 17               |     |
|                             | 14635       | At2g14610 | PR-1-like (PR-1)                                                                                 | 16                                  | 40               |     |
|                             | 14636       | At1g75040 | thaumatin-like, PR5                                                                              | 8.7                                 | 21               |     |
|                             | 19171       | At2g43510 | trypsin inhibitor                                                                                | 5.5                                 | 16               |     |
|                             | 12530       | AT4g37150 | hydroxynitrile lyase-like                                                                        | 2                                   | 4.4              |     |
|                             | 17012       | At1g72260 | thionin (Thi2.1)                                                                                 | A                                   | 12               |     |

|                       |                  |           |                                                                                            |                                             |                  |     |
|-----------------------|------------------|-----------|--------------------------------------------------------------------------------------------|---------------------------------------------|------------------|-----|
| R genes               | 16702            | At2g02360 | phloem-specific lectin                                                                     | 5.4                                         | 5.6              |     |
|                       | 16440            | At2g40000 | nematode resistant protein-like                                                            | 5.9                                         | 11               |     |
|                       | 16365            | At2g32680 | disease resistant protein, LRR?                                                            | 62                                          | 68               |     |
|                       | 16347            | At2g24160 | disease resistant protein                                                                  | 5.4                                         | 7.9              |     |
|                       | 12251            | At2g34930 | disease resistant protein                                                                  | 4.6                                         | 5.1              |     |
|                       | 13641            | At4g33300 | disease resistant protein, RFL1 R gene                                                     | 3.6                                         | 4.1              |     |
|                       | 19423            | At3g25510 | disease resistance protein RPP1-WsB                                                        | 2.4                                         | 3.4              |     |
|                       | 14640            | At2g39200 | Mlo 12                                                                                     | 3.2 <sup>f</sup>                            | 3.7              |     |
|                       | 14111            | At4g13900 | disease resistance protein, similarity to Hcr9-9A,<br><i>Lycopersicon pimpinellifolium</i> | 5.3                                         | 4.3 <sup>f</sup> |     |
|                       | 14649            | At1g12220 | NBS/LRR disease resistance protein, RPS5                                                   | 8.4                                         | A                |     |
| <b>Senescence</b>     | 20491            | At2g29350 | tropinone reductase (SAG13-1)                                                              | 17                                          | 29               |     |
|                       | 19178            | AT5g20230 | blue copper binding-like (SAG14)                                                           | 8.2                                         | 12               |     |
|                       | 19181            | At4g02380 | late embryogenesis abundant protein homolog (SAG21)                                        | 7.6                                         | 11               |     |
|                       | 19946            | At2g23810 | SAG5                                                                                       | 4                                           | 3.7              |     |
|                       | 19614            | At1g09500 | cinnamyl alcohol dehydrogenase (SAG26)                                                     | 4                                           | 12               |     |
|                       | 13243            | AT4g37990 | cinnamyl-alcohol dehydrogenase ELI3-2 (SAG25)                                              | 3.7                                         | 3.4              |     |
|                       | 13004            | At2g17840 | SAG12/erd7 (cysteine protease)                                                             | 3.5                                         | 4.1              |     |
|                       | 20017            | At2g44290 | Unknown, lipid transfer protein (YLS3)                                                     | 30                                          | 38               |     |
|                       | 18255            | At2g38860 | YLS5, protease pfrp1                                                                       | 4.5                                         | 8.1              |     |
|                       | 16632            | AT5g13170 | SAG29-MtN3-like                                                                            | 2.6                                         | 6.4              |     |
| <b>Stress related</b> | 15137            | At2g44790 | blue copper-binding protein II                                                             | 33                                          | 32               |     |
|                       | 16150            | AT4g12480 | pEARLI 1                                                                                   | 15                                          | 18               |     |
|                       | 16914            | AT4g11650 | osmotin like (OSL3)                                                                        | 13                                          | 20               |     |
|                       | 20421            | AT4g14630 | Oxalate oxidase                                                                            | 10                                          | 11               |     |
|                       | 20641            | At1g52690 | LEA76 type1                                                                                | 7.5                                         | 6.8              |     |
|                       | 13842            | At1g24140 | zn-metalloproteinase                                                                       | 6.8                                         | 9                |     |
|                       | 14083            | At2g41380 | embryo-abundant protein                                                                    | 4.6                                         | 6.8              |     |
|                       | 12801            | At1g55450 | embryonic abundant protein                                                                 | 3.1                                         | 3.7              |     |
|                       | 15162            | At3g04720 | hevein-like protein precursor                                                              | 3.4                                         | 5.3              |     |
|                       | 13491            | At1g48610 | HAL3B F186                                                                                 | 3.7 <sup>t</sup>                            | 5                |     |
|                       | 15967            | AT4g01610 | putative cathepsin B-like cysteine protease                                                | 2.9                                         | 3.7              |     |
|                       | 16439            | At1g31580 | CXc750                                                                                     | 6.6 <sup>f</sup>                            | 7.7              |     |
|                       | 19046            | At2g44240 | peptidase?                                                                                 | 3.1 <sup>f</sup>                            | 5.5              |     |
|                       | 19152            | At5g06760 | late embryogenesis abundant protein                                                        | 2.9                                         | 4.9              |     |
|                       | 14800            | At2g18370 | putative lipid transfer                                                                    | 3.4                                         | 2.4              |     |
| <b>Metabolism</b>     |                  |           |                                                                                            |                                             |                  |     |
|                       | Trp biosynthesis | 19555     | AT4g00700                                                                                  | phosphoribosylanthranilate transferase-like | 9                | 13  |
|                       |                  | 14673     | AT4g27070                                                                                  | tryptophan synthase beta-subunit (TSB2)     | 3.1              | 3.7 |
| 14672                 |                  | At4g02610 | tryptophan synthase alpha chain TSA1                                                       | 2.3                                         | 3.8              |     |

|                      |          |           |                                                                                                     |                                                                          |     |     |
|----------------------|----------|-----------|-----------------------------------------------------------------------------------------------------|--------------------------------------------------------------------------|-----|-----|
| Nitrogen & Carbon    | 13818    | At2g13810 | aspartate aminotransferase (ASP1), mitochondrial?                                                   | 23                                                                       | 21  |     |
|                      | 15594    | At5g07440 | glutamate dehydrogenase 2 (gdh2)                                                                    | 4.4                                                                      | 1.8 |     |
| Tyr                  | 17008    | At2g24850 | tyrosine aminotransferase (similarity with <i>rooty</i> )                                           | 18                                                                       | 19  |     |
| Auxin                | 12500    | At1g51760 | IAA-Ala hydrolase (IAR3)                                                                            | 5.9                                                                      | 8.7 |     |
| Lys catabolism       | 15161    | AT4g33150 | lysine-ketoglutarate reductase/saccharopine dehydrogenase                                           | 4.5                                                                      | 8.9 |     |
|                      | 15120    | At5g17330 | glutamate decarboxylase 1 (GAD 1)                                                                   | A                                                                        | 9.2 |     |
| Asn biosynthesis     | 15154    | AT3g47340 | At-ASN1, glutamine-dependent asparagine synthetase                                                  | 2.9                                                                      | 6.7 |     |
| Ethylene             | 16817    | AT4g11280 | ACC synthase (AtACS-6)                                                                              | 3.2 <sup>f</sup>                                                         | 3.9 |     |
| TCA cycle            | 19225    | AT5g65750 | 2-oxoglutarate dehydrogenase E1 subunit                                                             | 2.4                                                                      | 3.9 |     |
| sulfate assimilation | 16029    | AT5g43780 | ATP sulfurylase precursor (APS4)                                                                    | 5.3                                                                      | 2.5 |     |
| Cell Wall            | 20269    | At2g45220 | Pectinesterase                                                                                      | 14                                                                       | 22  |     |
|                      | 20239    | AT3g13790 | beta-fructofuranosidase 1                                                                           | 7.7                                                                      | 15  |     |
|                      | 12642    | At2g15390 | xyloglucan fucosyl transferase-like (FUT4)                                                          | 6.8                                                                      | 12  |     |
|                      | 20432    | At1g32170 | xyloglucan endotransglycosylase (XTR4)                                                              | 6.5                                                                      | 6.9 |     |
|                      | 13900    | AT3g47380 | Pectinesterase                                                                                      | 3.5                                                                      | 6.5 |     |
|                      | 12449    | At4g24000 | cellulose synthase                                                                                  | 1.5                                                                      | 6.6 |     |
|                      | 17748    | At4g20460 | UDP-glucose 4-epimerase - like                                                                      | A                                                                        | 3.4 |     |
|                      | 18544    | At1g30620 | UDP-galactose-4-epimerase                                                                           | 2.6                                                                      | 3.8 |     |
|                      | 19546    | At2g14620 | putative endoxyloglucan                                                                             | A                                                                        | 3.6 |     |
|                      | 19747    | At1g10050 | Endoxylanase                                                                                        | 3.5 <sup>f</sup>                                                         | 4   |     |
|                      | Alkaloid | 14016     | At1g30700                                                                                           | reticuline oxidase-like                                                  | 11  | 18  |
|                      |          | 13908     | AT4g20860                                                                                           | berberine bridge enzyme                                                  | 8.3 | 10  |
|                      |          | 17422     | AT4g13660                                                                                           | isoflavone reductase-like protein                                        | 2.7 | 3.4 |
|                      |          | 20096     | At2g34810                                                                                           | berberine bridge enzyme                                                  | A   | 5.6 |
|                      |          | 19840     | At1g30720                                                                                           | putative reticuline oxidase-like                                         | 5.1 | A   |
|                      | Steroids | 18567     | At2g47130                                                                                           | alcohol dehydrogenase (similarity to 3-beta-hydroxysteroiddehydrogenase) | 11  | 21  |
| 16888                |          | At2g37770 | alcohol dehydrogenase (aldose reductase, steroids)                                                  | 5.4                                                                      | 7   |     |
| 17744                |          | At2g37760 | alcohol dehydrogenase (aldose reductase, steroids)                                                  | 3.4                                                                      | 4.4 |     |
| Carbohydrates        | 20446    | At1g05570 | callose synthase 1 catalytic subunit (CalS1)                                                        | 3.3                                                                      | 3.8 |     |
|                      | 12998    | AT3g47800 | aldose 1-epimerase-like protein                                                                     | 2.2                                                                      | 4   |     |
| Cytochrome P450      | 14609    | At2g30770 | CYP71A13                                                                                            | 22                                                                       | 58  |     |
|                      | 12989    | At2g34490 | putative cytochrome P450 (weak similarity to C-22 sterol desaturase, ergosterol biosynthesis yeast) | 13                                                                       | 18  |     |
|                      | 12482    | At2g44890 | putative cytochrome P450                                                                            | 11                                                                       | 12  |     |
|                      | 20479    | AT4g39950 | CYP79B2 (Converts Trp to aldoxime in IAA biosynthesis)                                              | 9.5                                                                      | 17  |     |
|                      | 14032    | AT4g37370 | CYP81D8 (weak similarity to isoflavone 2'-hydroxylase)                                              | 6.3                                                                      | 8.8 |     |
|                      | 13100    | At2g45570 | CYP76C2, YLS6 (similarity to geraniol 10-hydroxylase)                                               | 4.2                                                                      | 7.2 |     |
|                      | 17522    | AT5g36220 | CYP91A1 (weak similarity to isoflavone 2'-hydroxylase)                                              | 3.5                                                                      | 6.8 |     |
|                      | 17039    | AT3g26220 | CYP71B3                                                                                             | 3.2 <sup>f</sup>                                                         | 7.5 |     |

|                                                     |                     |                                                          |                                                                         |                                                   |     |    |
|-----------------------------------------------------|---------------------|----------------------------------------------------------|-------------------------------------------------------------------------|---------------------------------------------------|-----|----|
| Others                                              | 20290               | At5g25130                                                | CYP71B12                                                                | 1.8                                               | 4.8 |    |
|                                                     | 16993               | At5g58860                                                | CYP86A1                                                                 | 3.6                                               | A   |    |
|                                                     | 18753               | AT4g10500                                                | putative Fe(II)/ascorbate oxidase                                       | 5.4                                               | 11  |    |
|                                                     | 16721               | At2g31870                                                | poly(ADP-ribose) glycohydrolase                                         | 4.7                                               | 8.9 |    |
|                                                     | 13215               | At1g67980                                                | S-adenosyl-L-methionine:trans-caffeoyl-Coenzyme A 3-O-methyltransferase | 2.2                                               | 7.1 |    |
|                                                     | 13351               | At4g20320                                                | cytidine 5'-triphosphate synthase                                       | A                                                 | 3.9 |    |
|                                                     | 15496               | At2g36800                                                | UDP-glucosyl transferase                                                | 3.6 <sup>f</sup>                                  | 5.8 |    |
|                                                     | 16791               | AT4g39830                                                | L-ascorbate oxidase                                                     | 2.6                                               | 4.3 |    |
|                                                     | 16968               | At4g34131                                                | glucosyltransferase -like                                               | A                                                 | 4.1 |    |
|                                                     | 17051               | At2g29720                                                | CTF2B, monooxygenase                                                    | 3.1 <sup>f</sup>                                  | 3.6 |    |
|                                                     | 17481               | At1g03400                                                | E8 homolog                                                              | 7.6 <sup>f</sup>                                  | 7   |    |
|                                                     | 17548               | At1g09500                                                | putative cinnamyl alcohol dehydrogenase                                 | 3.3 <sup>f</sup>                                  | 8.4 |    |
|                                                     | 17595               | At2g38400                                                | b-alanine-pyruvate aminotransferase                                     | 2.2                                               | 4.2 |    |
|                                                     | 18888               | At1g15380                                                | Glyoxalase                                                              | 2.5                                               | 14  |    |
|                                                     | 16288               | At2g17720                                                | putative prolyl 4-hydroxylase, alpha subunit                            | 4                                                 | 2.1 |    |
|                                                     | 18920               | At2g30210                                                | laccase putative                                                        | 3.3                                               | 1.8 |    |
|                                                     | 16784               | At4g00040                                                | putative chalcone synthase                                              | 3.3                                               | 2.6 |    |
|                                                     | <b>Transporters</b> | 17899                                                    | AT4g15610                                                               | unknown, similarity to sodium channel protein     | 38  | 75 |
|                                                     |                     | 14731                                                    | At2g34660                                                               | multidrug resistance-associated protein 2; AtMRP2 | 12  | 12 |
| 12521                                               |                     | AT3g51860                                                | Ca <sup>2+</sup> /H <sup>+</sup> exchanging protein (CAX3)              | 8.6                                               | 14  |    |
| 17499                                               |                     | At2g46430                                                | cyclic nucleotide gated channel (CNGC3)                                 | 7.3                                               | 4.7 |    |
| 14116                                               |                     | AT5g26340                                                | hexose-transporter like (SPT13, MSS1, similar to HT2 tomato)            | 6.2                                               | 7.2 |    |
| 15338                                               |                     | At1g23840                                                | unknown, Sodium transporter?                                            | 4.3                                               | 6.6 |    |
| 17653                                               |                     | AT4g39030                                                | EDS5, MATE-transporter                                                  | 3.8                                               | 4.4 |    |
| 13627                                               |                     | At4g23700                                                | putative Na <sup>+</sup> /H <sup>+</sup> -exchanging                    | A                                                 | 8.2 |    |
| 13834                                               |                     | At4g01010                                                | cyclic nucleotide gated channel (CNGC4)                                 | A                                                 | 3.9 |    |
| 12347                                               |                     | At1g59820                                                | chromaffin granule ATPase II, phospholipid-transporting ATPase 3 (ALA3) | A                                                 | 5.9 |    |
| 16003                                               |                     | AT4g28390                                                | ADP, ATP carrier-like                                                   | 2.7                                               | 5.5 |    |
| 17775                                               |                     | At1g61800                                                | glucose-6-phosphate/phosphate-translocator (GPT)                        | 4.4 <sup>f</sup>                                  | 6.3 |    |
| 18328                                               |                     | At3g19930                                                | monosaccharide transport protein STP4                                   | 2.6                                               | 4.8 |    |
| 19581                                               | At2g46450           | cyclic nucleotide-regulated ion channel protein (cngc12) | 2.5                                                                     | 4.3                                               |     |    |
| <b>Cellular transport and Cellular organization</b> | 18720               | AT5g61210                                                | SNAP25A                                                                 | 2.8                                               | 3.5 |    |
|                                                     | 16939               | At2g33110                                                | Synaptobrevin                                                           | 4.2                                               | 5.1 |    |
|                                                     | 12247               | AT4g28710                                                | myosin heavy chain-like                                                 | 4.2                                               | 4.6 |    |
| <b>Protein destination</b>                          | 12341               | AT4g20110                                                | vacuolar sorting receptor-like                                          | 19                                                | 23  |    |

|                                   |       |           |                                                                                    |                  |                |
|-----------------------------------|-------|-----------|------------------------------------------------------------------------------------|------------------|----------------|
|                                   | 12434 | At2g36130 | cyclophilin (peptidylprolyl isomerase) like                                        | 11               | 10             |
|                                   | 16916 | AT5g02490 | Hsc70-2                                                                            | 7.1              | 14             |
|                                   | 13285 | AT5g52640 | AtHSP90-1                                                                          | 5.3              | 11             |
|                                   | 17278 | At1g30900 | vacuolar sorting receptor putative                                                 | 4.3              | 7.2            |
|                                   | 16043 | At1g10290 | ADL6 (dynamin-like protein 6)                                                      | 6                | 9.8            |
|                                   | 17097 | At1g08450 | calreticulin (Crt3), also binds to Calcium                                         | 3.2              | 4.7            |
|                                   | 18783 | At2g45500 | unknown (similarity to human spastin)                                              | 2.4              | 3.1            |
|                                   | 13284 | At3g12580 | heat shock protein 70                                                              | 2.1              | 4.4            |
|                                   | 13238 | At1g28210 | mitochondrial protein (AtJ1), Homolog of DnaJ                                      | A                | 7.3            |
|                                   | 15508 | At2g29070 | ubiquitin fusion-degradation protein                                               | 3 <sup>f</sup>   | 4.2            |
|                                   | 20140 | At4g31670 | Similarity to deubiquitinating enzyme (DUB-1)                                      | 3.6 <sup>f</sup> | 4.7            |
|                                   | 18909 | At2g04160 | subtilisin-like protease (AIR3)                                                    | 3.8              | 2.8            |
|                                   | 17138 | At1g03550 | putative secretory carrier-associated membrane protein                             | 4.4              | 2.9            |
| <b>Energy</b>                     | 15424 | At3g50930 | BCS1 protein-like protein (Mitochondrial protein)                                  | A                | 7.3            |
|                                   | 12562 | At4g21090 | MFDX2, adrenodoxin – like                                                          | 3.5              | 3 <sup>f</sup> |
| <b>Ionic homeostasis</b>          | 16031 | AT5g01600 | ferritin 1 precursor                                                               | 3.5              | 4.7            |
| <b>Cell Growth, Cell Division</b> | 15431 | AT4g27280 | unknown, centrin?                                                                  | 6.6              | 7.8            |
|                                   | 16846 | At3g22880 | Meiotic Recombination protein DMC1                                                 | 2.5              | 4.1            |
|                                   | 19257 | At1g04280 | Histone 1flk                                                                       | 1.8              | 4.3            |
|                                   | 17854 | AT4g37010 | centrin-like                                                                       | 2.7              | 4.8            |
| <b>Unclassified</b>               | 13177 | AT4g12720 | growth factor like (NUDIX Hydrolase family)                                        | 7.3              | 6              |
|                                   | 13880 | AT4g25900 | apospory-associated like                                                           | 3.1 <sup>f</sup> | 3.6            |
|                                   | 13110 | AT4g04620 | symbiosis-related, Microtubule associated protein 1A/1B, light chain 3             | 2.1              | 3.8            |
|                                   | 18069 | BAC F4C21 | small nucleolar RNA R30                                                            | A                | 3.3            |
|                                   | 20051 | At1g08940 | Similarity to Saccharomyces hypothetical protein YDR051c (phosphoglycerate mutase) | 1.9              | 4.2            |
| <b>Unknowns</b>                   | 13645 | At1g05340 |                                                                                    | 4.8              | 12             |
|                                   | 15526 | At1g10040 |                                                                                    | 3.9              | 4.2            |
|                                   | 12136 | At1g15350 |                                                                                    | 4.5              | 5.1            |
|                                   | 14964 | At1g65500 |                                                                                    | 19               | 28             |
|                                   | 15846 | At2g14560 |                                                                                    | 5.7              | 6.8            |
|                                   | 17894 | At2g18690 |                                                                                    | 8.1              | 9.6            |
|                                   | 17907 | At2g37750 |                                                                                    | 4.6              | 6.9            |
|                                   | 13656 | AT4g01870 |                                                                                    | 9.4              | 9.9            |
|                                   | 19247 | AT4g03450 |                                                                                    | 4.6              | 6.4            |
|                                   | 19182 | AT4g33050 |                                                                                    | 17               | 24             |
|                                   | 14278 | AT4g36090 |                                                                                    | 4.3              | 4.7            |
|                                   | 13059 | At4g36550 |                                                                                    | 3.9              | 4.4            |

|       |           |                                               |                            |                  |     |
|-------|-----------|-----------------------------------------------|----------------------------|------------------|-----|
| 14882 | AT4g39670 | Similarity to a gene induced by high salinity | 6.8                        | 11               |     |
| 19977 | At1g02150 |                                               | 2                          | 6.3              |     |
| 14130 | At1g03080 |                                               | 2.6                        | 3.1              |     |
| 15477 | At1g10690 |                                               | A                          | 6.3              |     |
| 12227 | At1g13990 |                                               | 2.8                        | 4.3              |     |
| 18415 | At1g27560 |                                               | A                          | 11               |     |
| 13582 | At1g60200 |                                               | RNA metabolism (splicing?) | 4.5 <sup>f</sup> | 3.7 |
| 19230 | At1g62420 |                                               |                            | 2.5              | 4.7 |
| 14959 | At1g79450 |                                               |                            | 2.8              | 6   |
| 13865 | At2g21850 |                                               |                            | A                | 3.9 |
| 12765 | At2g22660 | 2.5                                           |                            | 3.3              |     |
| 13985 | At2g25930 | 3.2 <sup>f</sup>                              |                            | 4.7              |     |
| 17886 | At2g26190 | 2.7                                           |                            | 3.6              |     |
| 15485 | At2g27310 | 2.6                                           |                            | 3.4              |     |
| 14924 | At2g28400 | 2.9                                           |                            | 4.4              |     |
| 14462 | At2g32130 | A                                             |                            | 3.3              |     |
| 18631 | At2g41640 | 3.1 <sup>f</sup>                              |                            | 3.7              |     |
| 15815 | AT4g17070 | 2.3                                           |                            | 4                |     |
| 13971 | AT4g17120 | 3 <sup>f</sup>                                |                            | 3.5              |     |
| 18660 | AT4g17670 | A                                             |                            | 5.2              |     |
| 16299 | AT4g19880 | 3 <sup>f</sup>                                |                            | 4.6              |     |
| 20554 | AT4g21670 | 2.1                                           |                            | 3.4              |     |
| 18224 | At4g21830 | 2.8                                           |                            | 6.2              |     |
| 17376 | At4g21970 | 2.6                                           | 4                          |                  |     |
| 15076 | At4g23530 | A                                             | 5.8                        |                  |     |
| 12995 | AT4g24970 | 2.7                                           | 3.3                        |                  |     |
| 12240 | At4g27860 | A                                             | 6.6                        |                  |     |
| 18409 | At1g03260 | 4.7                                           | A                          |                  |     |
| 12062 | At2g01650 | 3.4                                           | 3.2 <sup>f</sup>           |                  |     |
| 18263 | At2g18680 | 6.9                                           | 6.6 <sup>f</sup>           |                  |     |
| 15865 | At2g20480 | 3.3                                           | 3.3 <sup>f</sup>           |                  |     |
| 19386 | At2g22510 | 3.7                                           | 1.1                        |                  |     |
| 16514 | At4g38080 | 3.4                                           | 1.4                        |                  |     |

## Notes for Table 2.

- a. Genes designated as up-regulated satisfy three criteria: signals are designated as “present” in mutant samples; signals have an average difference in expression level of at least 100; and the difference between mutant and wildtype signals is at least three-fold in three out of four comparisons.
- b. Gene functional groups are based on the classification scheme of Schoof, *et al.* (Nucleic Acids Res, 30:91-93, 2002; see <http://mips.gsf.de/proj/that/db>).
- c. Probe set numbers as assigned by Affymetrix for the GeneChip® Arabidopsis Genome Array.
- d. Arabidopsis gene numbers as assigned by the Arabidopsis Genome Initiative (<http://www.arabidopsis.org/info/agi.html>).
- e. Values represent the mean of four comparisons (two mutant samples v. two wildtype samples). A = absent in both wildtype and mutant samples. Entries highlighted in yellow are up-regulated in *ada2b-1* leaves; entries highlighted in blue are up-regulated in *gcn5-1* leaves.
- f. Mean value is greater than three-fold, but the difference between mutant and wildtype signals was less than three-fold in at least two of the comparisons.
