# Supplementary material
Source: PubMed Central journal article supplement (PMC150018)
Supplement: plntcell_15_3_626__2.pdf [file plntcell_15_3_626__2.pdf]

Table 3. Genes down-regulated in leaves of *Arabidopsis ada2b-1* or *gcn5-1* mutant plants as assayed by Affymetrix microarray.<sup>a</sup>

| Gene functional group <sup>b</sup> | Probe set <sup>c</sup> | Gene number <sup>d</sup> | Gene description                                                                | Fold change in <i>ada2b-1</i> <sup>e</sup> | Fold change in <i>gcn5-1</i> <sup>e</sup> |
|------------------------------------|------------------------|--------------------------|---------------------------------------------------------------------------------|--------------------------------------------|-------------------------------------------|
| <b>Transcription</b>               | 13301                  | At1g04240                | IAA3                                                                            | -7.6                                       | -13                                       |
|                                    | 13662                  | AT3g23050                | IAA7 ( <i>axr2</i> )                                                            | -5.3                                       | -9.9                                      |
|                                    | 17032                  | At2g03710                | MADS-box protein ( <i>AGL3</i> )                                                | -6.1                                       | -3.6                                      |
|                                    | 18036                  | At2g33810                | SPL3                                                                            | -25                                        | -6.8                                      |
|                                    | 20044                  | AT4g27310                | similarity to zinc-finger protein S3574, <i>Oryza</i>                           | -2.9                                       | -5.6                                      |
|                                    | 20362                  | At1g71030                | myb-related transcription factor                                                | -2.1                                       | -3.3                                      |
|                                    | 12876                  | At1g69120                | agamous-like 8 ( <i>AGL8</i> , <i>FUL</i> )                                     | -11                                        | -1.8                                      |
|                                    | 13023                  | At4g00050                | putative transcriptional regulator                                              | -4                                         | -4 <sup>f</sup>                           |
|                                    | 18026                  | AT3g15270                | SPL5                                                                            | -4.9                                       | -1.2                                      |
| <b>Signal Transduction</b>         |                        |                          |                                                                                 |                                            |                                           |
| Receptor-like kinases              | 12299                  | AT4g23290                | Receptor like serine/threonine kinase, DUF26                                    | -4.8                                       | -8.6                                      |
|                                    | 14048                  | At2g18890                | Kinase RLCK VI, domain K                                                        | -13                                        | -12                                       |
|                                    | 18543                  | At2g36570                | receptor-like kinase, LRRIII, LRR5                                              | -12                                        | -5.8                                      |
| Lipases                            | 18115                  | At1g54820                | Receptor-like kinase EXTENSIN                                                   | -7.3                                       | -3.1 <sup>f</sup>                         |
|                                    | 17113                  | AT5g58670                | PI-PLC (PLC1)                                                                   | -5.3                                       | -7.2                                      |
|                                    | 18890                  | AT4g38690                | putative PI-PLC                                                                 | -5.4                                       | -4                                        |
|                                    | 12777                  | At1g54000                | myrosinase-associated protein Lipase/Acylhydrolase                              | -13                                        | -11                                       |
|                                    | 13793                  | At4g26790                | putative APG protein (lipase)                                                   | -2.4                                       | -3.7                                      |
|                                    | 16434                  | AT4g18970                | unknown, lipase domain                                                          | -3.6                                       | -2.2                                      |
| Phosphatases                       | 13587                  | At1g04040                | putative acid phosphatase                                                       | -4.4                                       | -3.1 <sup>f</sup>                         |
| Others                             | 13085                  | At1g78820                | putative glycoprotein ep1                                                       | -10                                        | -7.5                                      |
|                                    | 15202                  | At5g39340                | His-Asp Phosphotransfer Signal Transducer AHP3                                  | 0                                          | -10                                       |
| <b>Cell Rescue, Defense</b>        |                        |                          |                                                                                 |                                            |                                           |
| Defense related genes              | 14606                  | At2g32990                | putative glucanase (similarity to $\beta$ -1,4 glucanase from <i>fragaria</i> ) | -7.7                                       | -7.1                                      |
|                                    | 15190                  | At2g26740                | epoxide hydrolase                                                               | -6.3                                       | -5.8                                      |
|                                    | 12788                  | At1g23130                | ripening-induced protein                                                        | -3.2                                       | -3 <sup>f</sup>                           |
|                                    | 14803                  | At1g03020                | Glutaredoxin                                                                    | -2.8                                       | -3.2                                      |
|                                    | 20440                  | AT4g38660                | thaumatin-like protein                                                          | -3.9                                       | -2.7                                      |
|                                    | 13242                  | AT4g37980                | Eli3-1 cinnamyl alcohol dehydrogenases                                          | -5.3                                       | -3.1 <sup>f</sup>                         |
| <b>Stress related</b>              | 18699                  | AT5g15960                | <i>cor6.6</i>                                                                   | -6.4                                       | -5                                        |
|                                    | 20391                  | At2g23560                | acetone-cyanohydrin lyase                                                       | -7.2                                       | -5                                        |
|                                    | 13160                  | At2g23610                | acetone-cyanohydrin lyase                                                       | -3.2 <sup>f</sup>                          | -9.8                                      |
|                                    | 13546                  | At2g22170                | unknown, similarity to bn116 dehydration induced                                | -3.9                                       | -2.6                                      |

|                        |       |           |                                                                          |                   |                   |
|------------------------|-------|-----------|--------------------------------------------------------------------------|-------------------|-------------------|
|                        | 16048 | At1g73330 | Dr4 (protease inhibitor)                                                 | -6.3              | -0.7              |
| <b>Metabolism</b>      |       |           |                                                                          |                   |                   |
| Cell Wall              | 15178 | AT4g14130 | xyloglucan endotransglycosylase-related protein (XTR7)                   | -7.5              | -7.7              |
|                        | 17305 | At1g53830 | Pectin methylesterase (ATPME2), pectinesterase2                          | -4                | -3.2              |
|                        | 18265 | AT4g12730 | fasciclin-like arabinogalactan-protein 2                                 | -13               | -9.6              |
|                        | 18533 | AT5g65730 | endoxyloglucan tranferase-like                                           | -9.1              | -7.5              |
|                        | 20675 | At2g20750 | b-expasin B1                                                             | -12               | -11               |
|                        | 12787 | At2g45470 | fasciclin-like arabinogalactan-protein 8                                 | -2.8              | -3.4              |
|                        | 12097 | At2g20870 | gibberellin induced cell wall protein                                    | -13               | 0                 |
|                        | 13628 | AT4g23820 | Polygalacturonase                                                        | -5.8              | -2.6              |
|                        | 16438 | At1g03870 | fasciclin-like arabinogalactan-protein 9                                 | -4.9              | -2.9              |
|                        | 17494 | AT3g29030 | expansin At-EXP5 (At-EXP5)                                               | -4.2              | -2.6              |
|                        | 18911 | At1g04680 | pectate lyase                                                            | -3.6              | -0.8              |
|                        | 20316 | At4g23990 | cellulose synthase catalytic                                             | -3.4              | -2.1              |
| Alkaloid               | 13622 | AT4g20820 | reticuline oxidase-like                                                  | -4.5              | -4.6              |
|                        | 18635 | At2g43920 | Thio methyltransferase (sulfur volatiles)                                | -7.2              | -2.8              |
| Cytochrome P450        | 19502 | At4g39510 | cytochrome P450 -like                                                    | -4.1              | -2.1              |
| Flavonoid biosynthesis | 17089 | AT4g36220 | ferulate-5-hydroxylase (FAH1)                                            | -3.5              | -3.1 <sup>f</sup> |
|                        | 17123 | At1g65060 | 4-coumarate:CoA ligase 3                                                 | -3.3              | -2.7              |
| Others                 | 12269 | AT4g34650 | squalene synthase 2                                                      | -7.4              | -4.7              |
|                        | 13561 | F5I14.13  | unknown N-acetyl-beta-glucosaminidase-like, Glycosyl hydrolase family 20 | -4.2              | -5.4              |
|                        | 16629 | AT4g15440 | hydroperoxide lyase (HPL1)                                               | -7.8              | -5.1              |
|                        | 17187 | AT4g08870 | arginase (arg2)                                                          | -24               | -29               |
|                        | 13463 | AT4g33790 | male sterility 2-like, Fatty acid -Coenzyme A reductase                  | -29               | -8.8              |
|                        | 14062 | At2g47780 | Similarity to small rubber particle protein                              | -3.3              | -2.8              |
|                        | 14497 | At4g02850 | Phenazine biosynthesis-like protein                                      | -2.4              | -3.6              |
|                        | 13245 | At5g40280 | beta subunit of protein farnesyl transferase ERA1                        | -1.1              | -7.3              |
| Lipid biosynthesis     | 13618 | At2g05990 | enoyl-ACP reductase (enr-A)                                              | -1.8              | -6.9              |
| <b>Transporters</b>    |       |           |                                                                          |                   |                   |
|                        | 17642 | AT4g04750 | sugar transporter                                                        | -10               | -3.9              |
|                        | 15607 | AT5g15410 | cyclic nucleotide-gated cation channel (CNGC2 or DND1)                   | -3.7 <sup>f</sup> | -4.1              |
| Aquaporins             | 14714 | AT3g26520 | salt-stress induced tonoplast intrinsic protein (gamma TIP2 OR TIP1;2)   | -2.4              | -7.8              |
|                        | 15100 | AT4g35100 | plasma membrane intrinsic protein PIP3                                   | -3.2 <sup>f</sup> | -3.3              |
|                        | 15977 | At2g45960 | aquaporin (plasma membrane intrinsic)                                    | -1.6              | -4.4              |
|                        | 15122 | At3g16240 | delta tonoplast integral protein                                         | -4.2              | -3.3 <sup>f</sup> |
|                        | 15962 | At2g36830 | aquaporin (tonoplast intrinsic protein gamma 1, TIP1;1)                  | -4.4              | -3.4 <sup>f</sup> |

|                                                     |       |           |                                                         |                 |                   |
|-----------------------------------------------------|-------|-----------|---------------------------------------------------------|-----------------|-------------------|
| Other                                               | 16030 | At1g01620 | transmembrane protein TMP-B (PIP1;3)                    | -3.8            | -2.3              |
|                                                     | 13784 | At2g13610 | ABC transporter [AtWBC5]                                | -3.6            | -1.9              |
|                                                     | 19717 | AT4g10770 | sc icp4, oligopeptide transporter                       | -3.8            | -3.1 <sup>f</sup> |
| <b>Cellular transport and Cellular organization</b> | 20212 | At2g31900 | Putative unconventional myosin                          | -3.2            | -2.3              |
|                                                     | 13032 | At2g46710 | Putative rac GTPase activating                          | -5              | -1.9              |
|                                                     | 20330 | At1g22740 | GTP-binding protein Rab7                                | -7.4            | -3.5 <sup>f</sup> |
|                                                     | 17567 | At5g03540 | AT4 (Exo70 exocyst complex subuni)                      | -17             | -3.4              |
| <b>Protein destination</b>                          | 14114 | AT4g21640 | subtilisin proteinase-like                              | -13             | -7.8              |
|                                                     | 19453 | At2g22980 | serine carboxypeptidase I                               | -8.3            | -6                |
|                                                     | 13603 | At4g21650 | subtilisin proteinase-like                              | -35             | -6.2 <sup>f</sup> |
| <b>Energy</b>                                       | 12738 | At2g34420 | type I chlorophyll a/b binding protein Lhb1B2           | -2.2            | -3.8              |
|                                                     | 14484 | At3g52720 | carbonic anhydrase (CAH1)                               | -2.7            | -4.4              |
|                                                     | 15097 | At1g15820 | Lhcb6                                                   | -1.9            | -4.3              |
|                                                     | 15153 | AT3g27690 | Lhcb2:4                                                 | -2.7            | -8.7              |
|                                                     | 15170 | AT5g54270 | LHCB3*1                                                 | -1.9            | -5.3              |
|                                                     | 15659 | At1g61520 | Lhca3*1                                                 | -1.2            | -4.9              |
|                                                     | 17087 | AT5g64040 | photosystem I PSI-N                                     | -2              | -3.8              |
|                                                     | 18088 | AT4g28750 | Subunit PSI-E-like (psaE1)                              | -2.5            | -4.2              |
|                                                     | 16540 | At2g26670 | HY1 heme oxygenase                                      | -0.7            | -4.3              |
|                                                     | 13213 | AT3g54890 | CAB1                                                    | -1.7            | -5.1              |
|                                                     | 17054 | At2g40100 | Lhcb4:3 protein (Lhcb4.3) CP29 antenna protein of PS II | -6.1            | -3.4 <sup>f</sup> |
| <b>Cell Growth, Cell Division</b>                   | 19187 | At3g12110 | actin-11 (ACT11)                                        | -7.2            | -5.2              |
|                                                     | 13228 | At1g70210 | cyclin delta-1                                          | -7.4            | -2.9              |
| <b>Unclassified</b>                                 | 16214 | F6H11.200 | retrotransposon - like protein                          | -3 <sup>f</sup> | -4.6              |
|                                                     | 18342 | At4g18570 | pherophorin – like                                      | -4.7            | -2                |
|                                                     | 19863 | At2g14900 | GA-regulated protein GAST1/GASA-like protein            | -16             | -3.5 <sup>f</sup> |
| <b>Unknowns</b>                                     | 14401 | AT4g15630 |                                                         | -13             | -8                |
|                                                     | 15896 | At1g11850 |                                                         | -3.5            | -3.8              |
|                                                     | 19184 | At1g27030 |                                                         | -5.5            | -3.7              |
|                                                     | 19889 | At2g32870 |                                                         | -14             | -7.2              |
|                                                     | 19901 | At2g32880 |                                                         | -12             | -3.7              |
|                                                     | 20054 | At1g03420 |                                                         | -9.2            | -9.1              |
|                                                     | 20061 | At1g26920 | unknown, lea?                                           | -6.4            | -4.5              |
|                                                     | 12095 | At2g32100 |                                                         | -2.2            | -3.4              |

|       |           |                                            |      |                   |
|-------|-----------|--------------------------------------------|------|-------------------|
| 13568 | At2g43010 |                                            | -2.1 | -3.9              |
| 13144 | At2g35860 |                                            | -4   | -2.2              |
| 14469 | AT4g00400 |                                            | -3.4 | -1.4              |
| 14582 | At2g38800 |                                            | -3.2 | -2.1              |
| 15901 | At1g54740 | hypothetical protein                       | -3.8 | -2.1              |
| 18270 | At2g30930 |                                            | -5.7 | -1.6              |
| 18881 | At1g12080 |                                            | -6.8 | -3.1 <sup>f</sup> |
| 19867 | AT3g24180 |                                            | -3.3 | -1.8              |
| 20558 | AT4g36850 | unknown, probable membrane protein YBR147w | -7.2 | -2.5              |

## Notes for Table 3.

- a. Genes designated as down-regulated satisfy three criteria: signals are designated as “present” in wildtype samples; signals have an average difference in expression level of at least 100; and the difference between mutant and wildtype signals is at least three-fold in three out of four comparisons.
- b. Gene functional groups are based on the classification scheme of Schoof, *et al.* (Nucleic Acids Res, 30:91-93, 2002; see <http://mips.gsf.de/proj/that/db>).
- c. Probe set numbers as assigned by Affymetrix for the GeneChip® Arabidopsis Genome Array.
- d. Arabidopsis gene numbers as assigned by the Arabidopsis Genome Initiative (<http://www.arabidopsis.org/info/agi.html>).
- e. Values represent the mean of four comparisons (two mutant samples v. two wildtype samples). Entries highlighted in yellow are down-regulated in *ada2b-1* leaves; entries highlighted in blue are down-regulated in *gcn5-1* leaves.
- f. Mean value is greater than three-fold, but the difference between mutant and wildtype signals was less than three-fold in at least two of the comparisons.
